# Supplementary material for: The Changing Effect of Economic Development on the Consumption-Based Carbon Intensity of Well-Being, 1990–2008
Source: PubMed Central journal article supplement (PMC4422519; doi:10.1371/journal.pone.0123920), 2015-05-06
Supplement: pone.0123920.s001.pdf [file pone.0123920.s001.pdf]

| <b>Country</b> | <b>Year</b> | <b>CIWB (log base 10)</b> | <b>GDP per capita (log base 10)</b> |
|----------------|-------------|---------------------------|-------------------------------------|
| Argentina      | 1990        | 1.7632709                 | 3.5135185                           |
| Argentina      | 1991        | 1.7638009                 | 3.5593721                           |
| Argentina      | 1992        | 1.7637888                 | 3.6025484                           |
| Argentina      | 1993        | 1.7613237                 | 3.6217946                           |
| Argentina      | 1994        | 1.761641                  | 3.6408713                           |
| Argentina      | 1995        | 1.7584465                 | 3.6228926                           |
| Argentina      | 1996        | 1.7585883                 | 3.6409155                           |
| Argentina      | 1997        | 1.7595165                 | 3.669562                            |
| Argentina      | 1998        | 1.7587534                 | 3.6809057                           |
| Argentina      | 1999        | 1.7571492                 | 3.6611017                           |
| Argentina      | 2000        | 1.7530366                 | 3.6530651                           |
| Argentina      | 2001        | 1.7502666                 | 3.6291468                           |
| Argentina      | 2002        | 1.7360513                 | 3.574944                            |
| Argentina      | 2003        | 1.7427368                 | 3.6077813                           |
| Argentina      | 2004        | 1.744377                  | 3.6414726                           |
| Argentina      | 2005        | 1.7447488                 | 3.6757845                           |
| Argentina      | 2006        | 1.7467373                 | 3.7072625                           |
| Argentina      | 2007        | 1.7491072                 | 3.7365558                           |
| Argentina      | 2008        | 1.7481636                 | 3.7640266                           |
| Australia      | 1990        | 1.8376384                 | 4.3971679                           |
| Australia      | 1991        | 1.8322675                 | 4.3901064                           |
| Australia      | 1992        | 1.8329689                 | 4.3866926                           |
| Australia      | 1993        | 1.8310244                 | 4.3999396                           |
| Australia      | 1994        | 1.8329267                 | 4.4125782                           |
| Australia      | 1995        | 1.8305291                 | 4.4243221                           |
| Australia      | 1996        | 1.8343492                 | 4.4356228                           |
| Australia      | 1997        | 1.832102                  | 4.4473821                           |
| Australia      | 1998        | 1.8380265                 | 4.4620724                           |
| Australia      | 1999        | 1.8265236                 | 4.4781111                           |
| Australia      | 2000        | 1.8196913                 | 4.489323                            |
| Australia      | 2001        | 1.8141962                 | 4.4916391                           |
| Australia      | 2002        | 1.8226447                 | 4.5030086                           |
| Australia      | 2003        | 1.8220828                 | 4.5111225                           |
| Australia      | 2004        | 1.822378                  | 4.5237361                           |
| Australia      | 2005        | 1.8230247                 | 4.5316288                           |
| Australia      | 2006        | 1.8220395                 | 4.5382394                           |
| Australia      | 2007        | 1.8213357                 | 4.5516736                           |
| Australia      | 2008        | 1.8051954                 | 4.5590375                           |
| Austria        | 1990        | 1.8340172                 | 4.4477846                           |
| Austria        | 1991        | 1.8351432                 | 4.4581439                           |
| Austria        | 1992        | 1.827177                  | 4.4623625                           |
| Austria        | 1993        | 1.8145032                 | 4.4610631                           |
| Austria        | 1994        | 1.8158412                 | 4.4697005                           |
| Austria        | 1995        | 1.8061523                 | 4.4804706                           |
| Austria        | 1996        | 1.8073905                 | 4.4904668                           |
| Austria        | 1997        | 1.7999365                 | 4.4998881                           |

|            |      |           |           |
|------------|------|-----------|-----------|
| Austria    | 1998 | 1.8037919 | 4.5155484 |
| Austria    | 1999 | 1.7995173 | 4.5298079 |
| Austria    | 2000 | 1.7984149 | 4.5444066 |
| Austria    | 2001 | 1.7964238 | 4.5464519 |
| Austria    | 2002 | 1.7951264 | 4.5516094 |
| Austria    | 2003 | 1.8003314 | 4.5532383 |
| Austria    | 2004 | 1.7996193 | 4.5616471 |
| Austria    | 2005 | 1.799086  | 4.5689912 |
| Austria    | 2006 | 1.7967115 | 4.5824946 |
| Austria    | 2007 | 1.7938917 | 4.5966131 |
| Austria    | 2008 | 1.7943895 | 4.6009197 |
| Bangladesh | 1990 | 1.8037483 | 2.4307635 |
| Bangladesh | 1991 | 1.8000026 | 2.4348419 |
| Bangladesh | 1992 | 1.7963428 | 2.4464415 |
| Bangladesh | 1993 | 1.792373  | 2.4564419 |
| Bangladesh | 1994 | 1.7886349 | 2.4645844 |
| Bangladesh | 1995 | 1.7852784 | 2.4763098 |
| Bangladesh | 1996 | 1.7816005 | 2.4868571 |
| Bangladesh | 1997 | 1.7779831 | 2.500711  |
| Bangladesh | 1998 | 1.7742425 | 2.5141233 |
| Bangladesh | 1999 | 1.7707371 | 2.5263759 |
| Bangladesh | 2000 | 1.7677322 | 2.5434538 |
| Bangladesh | 2001 | 1.7651739 | 2.5581454 |
| Bangladesh | 2002 | 1.7619431 | 2.5696322 |
| Bangladesh | 2003 | 1.7599325 | 2.585024  |
| Bangladesh | 2004 | 1.7572924 | 2.6050898 |
| Bangladesh | 2005 | 1.7547186 | 2.6244093 |
| Bangladesh | 2006 | 1.7521587 | 2.6470578 |
| Bangladesh | 2007 | 1.7497738 | 2.6693773 |
| Bangladesh | 2008 | 1.7473916 | 2.6909994 |
| Belgium    | 1990 | 1.8589992 | 4.4483412 |
| Belgium    | 1991 | 1.8634792 | 4.4546163 |
| Belgium    | 1992 | 1.8592181 | 4.4594515 |
| Belgium    | 1993 | 1.849296  | 4.4535574 |
| Belgium    | 1994 | 1.8515203 | 4.4660121 |
| Belgium    | 1995 | 1.8549562 | 4.4753378 |
| Belgium    | 1996 | 1.8524248 | 4.4806317 |
| Belgium    | 1997 | 1.855362  | 4.4955067 |
| Belgium    | 1998 | 1.8599861 | 4.502877  |
| Belgium    | 1999 | 1.866174  | 4.5169898 |
| Belgium    | 2000 | 1.8716951 | 4.531588  |
| Belgium    | 2001 | 1.8684861 | 4.5335877 |
| Belgium    | 2002 | 1.8731647 | 4.537506  |
| Belgium    | 2003 | 1.856433  | 4.5391778 |
| Belgium    | 2004 | 1.8713243 | 4.5512906 |
| Belgium    | 2005 | 1.8602803 | 4.5564408 |
| Belgium    | 2006 | 1.8714968 | 4.5650054 |

|          |      |           |           |
|----------|------|-----------|-----------|
| Belgium  | 2007 | 1.8734779 | 4.5741607 |
| Belgium  | 2008 | 1.8760147 | 4.5749875 |
| Bolivia  | 1990 | 1.8195954 | 2.9210957 |
| Bolivia  | 1991 | 1.8159766 | 2.9331089 |
| Bolivia  | 1992 | 1.8134772 | 2.929926  |
| Bolivia  | 1993 | 1.8118041 | 2.9378723 |
| Bolivia  | 1994 | 1.8089779 | 2.9476158 |
| Bolivia  | 1995 | 1.8064326 | 2.9576011 |
| Bolivia  | 1996 | 1.8027189 | 2.9664888 |
| Bolivia  | 1997 | 1.8019033 | 2.9780479 |
| Bolivia  | 1998 | 1.7998799 | 2.9901119 |
| Bolivia  | 1999 | 1.7970286 | 2.9828819 |
| Bolivia  | 2000 | 1.7923597 | 2.9847107 |
| Bolivia  | 2001 | 1.7885099 | 2.9831674 |
| Bolivia  | 2002 | 1.7860805 | 2.9851856 |
| Bolivia  | 2003 | 1.7860329 | 2.988369  |
| Bolivia  | 2004 | 1.781604  | 2.9979746 |
| Bolivia  | 2005 | 1.7795372 | 3.0089365 |
| Bolivia  | 2006 | 1.7781607 | 3.0217976 |
| Bolivia  | 2007 | 1.7760312 | 3.0339832 |
| Bolivia  | 2008 | 1.7736347 | 3.0528788 |
| Botswana | 1990 | 1.7984538 | 3.5717876 |
| Botswana | 1991 | 1.8019612 | 3.5904713 |
| Botswana | 1992 | 1.8161957 | 3.5907661 |
| Botswana | 1993 | 1.8248173 | 3.587244  |
| Botswana | 1994 | 1.8334554 | 3.5914541 |
| Botswana | 1995 | 1.8434609 | 3.6102467 |
| Botswana | 1996 | 1.851836  | 3.6246798 |
| Botswana | 1997 | 1.8638667 | 3.6485764 |
| Botswana | 1998 | 1.8794473 | 3.6426763 |
| Botswana | 1999 | 1.8887483 | 3.6744216 |
| Botswana | 2000 | 1.9246705 | 3.6753694 |
| Botswana | 2001 | 1.930433  | 3.6695899 |
| Botswana | 2002 | 1.9153695 | 3.6889841 |
| Botswana | 2003 | 1.9637981 | 3.7029879 |
| Botswana | 2004 | 1.9557261 | 3.7093683 |
| Botswana | 2005 | 1.952995  | 3.7238151 |
| Botswana | 2006 | 1.9512044 | 3.7524382 |
| Botswana | 2007 | 1.9534826 | 3.7842115 |
| Botswana | 2008 | 1.9581735 | 3.796651  |
| Brazil   | 1990 | 1.7735999 | 3.601998  |
| Brazil   | 1991 | 1.7712405 | 3.6013055 |
| Brazil   | 1992 | 1.7680351 | 3.5923512 |
| Brazil   | 1993 | 1.7665439 | 3.6054267 |
| Brazil   | 1994 | 1.7650079 | 3.6213492 |
| Brazil   | 1995 | 1.7651888 | 3.6334755 |
| Brazil   | 1996 | 1.76443   | 3.6360543 |

|          |      |           |           |
|----------|------|-----------|-----------|
| Brazil   | 1997 | 1.7631238 | 3.6438288 |
| Brazil   | 1998 | 1.7599202 | 3.6374067 |
| Brazil   | 1999 | 1.7564935 | 3.6320697 |
| Brazil   | 2000 | 1.7550126 | 3.6441148 |
| Brazil   | 2001 | 1.752564  | 3.6437005 |
| Brazil   | 2002 | 1.74944   | 3.6491726 |
| Brazil   | 2003 | 1.7462967 | 3.6484504 |
| Brazil   | 2004 | 1.745097  | 3.6672219 |
| Brazil   | 2005 | 1.7441681 | 3.6757147 |
| Brazil   | 2006 | 1.7432708 | 3.6879391 |
| Brazil   | 2007 | 1.7430834 | 3.7093572 |
| Brazil   | 2008 | 1.7427085 | 3.7272223 |
| Cambodia | 1990 | 1.8426108 | 2.3242825 |
| Cambodia | 1991 | 1.8385662 | 2.3443923 |
| Cambodia | 1992 | 1.8339687 | 2.363612  |
| Cambodia | 1993 | 1.8292688 | 2.3834241 |
| Cambodia | 1994 | 1.824668  | 2.4063    |
| Cambodia | 1995 | 1.8203973 | 2.4195288 |
| Cambodia | 1996 | 1.8154636 | 2.4296481 |
| Cambodia | 1997 | 1.8097539 | 2.4415981 |
| Cambodia | 1998 | 1.8042507 | 2.4519345 |
| Cambodia | 1999 | 1.7977085 | 2.4906954 |
| Cambodia | 2000 | 1.7911324 | 2.5177666 |
| Cambodia | 2001 | 1.7846497 | 2.5425624 |
| Cambodia | 2002 | 1.7768553 | 2.5625111 |
| Cambodia | 2003 | 1.772092  | 2.5903421 |
| Cambodia | 2004 | 1.7655338 | 2.6259169 |
| Cambodia | 2005 | 1.7599192 | 2.6731707 |
| Cambodia | 2006 | 1.7543478 | 2.7111861 |
| Cambodia | 2007 | 1.7492864 | 2.7473014 |
| Cambodia | 2008 | 1.7449578 | 2.7693697 |
| Canada   | 1990 | 1.8467938 | 4.4310909 |
| Canada   | 1991 | 1.8459355 | 4.4159997 |
| Canada   | 1992 | 1.8476904 | 4.4144535 |
| Canada   | 1993 | 1.8456792 | 4.4197401 |
| Canada   | 1994 | 1.8374536 | 4.4359442 |
| Canada   | 1995 | 1.8326818 | 4.4443762 |
| Canada   | 1996 | 1.830083  | 4.4466722 |
| Canada   | 1997 | 1.8365027 | 4.4600574 |
| Canada   | 1998 | 1.8325155 | 4.4737381 |
| Canada   | 1999 | 1.8302544 | 4.4935281 |
| Canada   | 2000 | 1.8378159 | 4.5118464 |
| Canada   | 2001 | 1.8320216 | 4.5151408 |
| Canada   | 2002 | 1.832222  | 4.5237635 |
| Canada   | 2003 | 1.8311693 | 4.5275304 |
| Canada   | 2004 | 1.8341497 | 4.5365214 |
| Canada   | 2005 | 1.8359241 | 4.5451573 |

|          |      |           |           |
|----------|------|-----------|-----------|
| Canada   | 2006 | 1.8348639 | 4.553787  |
| Canada   | 2007 | 1.8421674 | 4.559026  |
| Canada   | 2008 | 1.8426417 | 4.5573069 |
| Chile    | 1990 | 1.7408659 | 3.6150383 |
| Chile    | 1991 | 1.7378726 | 3.640442  |
| Chile    | 1992 | 1.7372932 | 3.6827416 |
| Chile    | 1993 | 1.7369224 | 3.7041609 |
| Chile    | 1994 | 1.7367184 | 3.7206713 |
| Chile    | 1995 | 1.737786  | 3.7573973 |
| Chile    | 1996 | 1.7403081 | 3.7818236 |
| Chile    | 1997 | 1.7424555 | 3.8034236 |
| Chile    | 1998 | 1.7394547 | 3.8114333 |
| Chile    | 1999 | 1.7391441 | 3.8025869 |
| Chile    | 2000 | 1.7364089 | 3.8163456 |
| Chile    | 2001 | 1.7277594 | 3.8254836 |
| Chile    | 2002 | 1.7287255 | 3.8298175 |
| Chile    | 2003 | 1.7243609 | 3.8418615 |
| Chile    | 2004 | 1.724874  | 3.862675  |
| Chile    | 2005 | 1.7259457 | 3.8816426 |
| Chile    | 2006 | 1.7258876 | 3.8959529 |
| Chile    | 2007 | 1.7265634 | 3.9135033 |
| Chile    | 2008 | 1.7262487 | 3.923364  |
| China    | 1990 | 1.7592878 | 2.6656569 |
| China    | 1991 | 1.7585752 | 2.6979539 |
| China    | 1992 | 1.7580397 | 2.7502975 |
| China    | 1993 | 1.7582412 | 2.8022097 |
| China    | 1994 | 1.7572503 | 2.8507636 |
| China    | 1995 | 1.7576053 | 2.8909765 |
| China    | 1996 | 1.7576673 | 2.9278172 |
| China    | 1997 | 1.7547327 | 2.9619925 |
| China    | 1998 | 1.7511868 | 2.990444  |
| China    | 1999 | 1.750345  | 3.0184959 |
| China    | 2000 | 1.7475979 | 3.0501032 |
| China    | 2001 | 1.7457599 | 3.081577  |
| China    | 2002 | 1.7438815 | 3.116492  |
| China    | 2003 | 1.7455313 | 3.1551796 |
| China    | 2004 | 1.7467217 | 3.1943875 |
| China    | 2005 | 1.7486309 | 3.2383285 |
| China    | 2006 | 1.7495845 | 3.2878274 |
| China    | 2007 | 1.7511677 | 3.3432253 |
| China    | 2008 | 1.7539082 | 3.3808106 |
| Colombia | 1990 | 1.7655191 | 3.4521647 |
| Colombia | 1991 | 1.763633  | 3.4535454 |
| Colombia | 1992 | 1.7637207 | 3.4666242 |
| Colombia | 1993 | 1.7636404 | 3.4686691 |
| Colombia | 1994 | 1.7632548 | 3.4853086 |
| Colombia | 1995 | 1.7590503 | 3.4994443 |

|            |      |           |           |
|------------|------|-----------|-----------|
| Colombia   | 1996 | 1.7567627 | 3.500489  |
| Colombia   | 1997 | 1.7557336 | 3.5074464 |
| Colombia   | 1998 | 1.7533662 | 3.502341  |
| Colombia   | 1999 | 1.7464644 | 3.4762522 |
| Colombia   | 2000 | 1.7445654 | 3.4877487 |
| Colombia   | 2001 | 1.7424927 | 3.4878428 |
| Colombia   | 2002 | 1.7411601 | 3.4915979 |
| Colombia   | 2003 | 1.7397208 | 3.5014347 |
| Colombia   | 2004 | 1.737397  | 3.5172523 |
| Colombia   | 2005 | 1.7375435 | 3.5305742 |
| Colombia   | 2006 | 1.7373955 | 3.5521675 |
| Colombia   | 2007 | 1.7364626 | 3.5746876 |
| Colombia   | 2008 | 1.7349435 | 3.5834816 |
| Costa Rica | 1990 | 1.7171963 | 3.5035427 |
| Costa Rica | 1991 | 1.7161818 | 3.5037834 |
| Costa Rica | 1992 | 1.7155165 | 3.5312673 |
| Costa Rica | 1993 | 1.7152722 | 3.5518783 |
| Costa Rica | 1994 | 1.7195808 | 3.5614209 |
| Costa Rica | 1995 | 1.7162542 | 3.567427  |
| Costa Rica | 1996 | 1.7143167 | 3.5603596 |
| Costa Rica | 1997 | 1.7151774 | 3.5729427 |
| Costa Rica | 1998 | 1.7154122 | 3.5971104 |
| Costa Rica | 1999 | 1.7167655 | 3.6209985 |
| Costa Rica | 2000 | 1.7144078 | 3.6189301 |
| Costa Rica | 2001 | 1.7142959 | 3.6144049 |
| Costa Rica | 2002 | 1.7182449 | 3.6182206 |
| Costa Rica | 2003 | 1.7149723 | 3.6370562 |
| Costa Rica | 2004 | 1.7155999 | 3.6474126 |
| Costa Rica | 2005 | 1.7139863 | 3.6647702 |
| Costa Rica | 2006 | 1.7133667 | 3.6941035 |
| Costa Rica | 2007 | 1.7128765 | 3.7203294 |
| Costa Rica | 2008 | 1.7122502 | 3.7253244 |
| Denmark    | 1990 | 1.8187866 | 4.561624  |
| Denmark    | 1991 | 1.8249841 | 4.5661082 |
| Denmark    | 1992 | 1.8174719 | 4.5731678 |
| Denmark    | 1993 | 1.8207257 | 4.5713315 |
| Denmark    | 1994 | 1.8198878 | 4.5932219 |
| Denmark    | 1995 | 1.8174757 | 4.6040713 |
| Denmark    | 1996 | 1.8226637 | 4.6137525 |
| Denmark    | 1997 | 1.8104947 | 4.625621  |
| Denmark    | 1998 | 1.8089567 | 4.6333266 |
| Denmark    | 1999 | 1.805072  | 4.6428695 |
| Denmark    | 2000 | 1.796814  | 4.6564785 |
| Denmark    | 2001 | 1.7951928 | 4.6579727 |
| Denmark    | 2002 | 1.796764  | 4.6586036 |
| Denmark    | 2003 | 1.8008441 | 4.6590861 |
| Denmark    | 2004 | 1.8041923 | 4.6678244 |

|          |      |           |           |
|----------|------|-----------|-----------|
| Denmark  | 2005 | 1.797989  | 4.6771194 |
| Denmark  | 2006 | 1.8018511 | 4.6901905 |
| Denmark  | 2007 | 1.7987753 | 4.6950867 |
| Denmark  | 2008 | 1.7943486 | 4.6891173 |
| Ecuador  | 1990 | 1.759061  | 3.4228692 |
| Ecuador  | 1991 | 1.7553765 | 3.431066  |
| Ecuador  | 1992 | 1.7561016 | 3.4303079 |
| Ecuador  | 1993 | 1.7557226 | 3.4291428 |
| Ecuador  | 1994 | 1.7451428 | 3.4377738 |
| Ecuador  | 1995 | 1.7489197 | 3.4381242 |
| Ecuador  | 1996 | 1.746298  | 3.4364152 |
| Ecuador  | 1997 | 1.7398058 | 3.4458104 |
| Ecuador  | 1998 | 1.7412558 | 3.4509108 |
| Ecuador  | 1999 | 1.7350511 | 3.4210935 |
| Ecuador  | 2000 | 1.7317608 | 3.4171971 |
| Ecuador  | 2001 | 1.734111  | 3.4257934 |
| Ecuador  | 2002 | 1.7340468 | 3.4348453 |
| Ecuador  | 2003 | 1.7315234 | 3.4382665 |
| Ecuador  | 2004 | 1.7337492 | 3.4644611 |
| Ecuador  | 2005 | 1.7332798 | 3.4789634 |
| Ecuador  | 2006 | 1.7329166 | 3.4899809 |
| Ecuador  | 2007 | 1.7326596 | 3.4918709 |
| Ecuador  | 2008 | 1.7317583 | 3.5112734 |
| Egypt    | 1990 | 1.7834999 | 2.9440687 |
| Egypt    | 1991 | 1.7807732 | 2.9407017 |
| Egypt    | 1992 | 1.7783782 | 2.9521583 |
| Egypt    | 1993 | 1.7773758 | 2.9576603 |
| Egypt    | 1994 | 1.7744909 | 2.9678669 |
| Egypt    | 1995 | 1.7732161 | 2.9808741 |
| Egypt    | 1996 | 1.7709941 | 2.9952873 |
| Egypt    | 1997 | 1.768787  | 3.0117713 |
| Egypt    | 1998 | 1.7690028 | 3.0221924 |
| Egypt    | 1999 | 1.7679687 | 3.0411166 |
| Egypt    | 2000 | 1.7671538 | 3.0569497 |
| Egypt    | 2001 | 1.7628937 | 3.0650833 |
| Egypt    | 2002 | 1.7635303 | 3.0682152 |
| Egypt    | 2003 | 1.7619027 | 3.0747442 |
| Egypt    | 2004 | 1.7604507 | 3.0849734 |
| Egypt    | 2005 | 1.7630029 | 3.0967339 |
| Egypt    | 2006 | 1.76046   | 3.118205  |
| Egypt    | 2007 | 1.7601261 | 3.1406359 |
| Egypt    | 2008 | 1.7617171 | 3.1633301 |
| Ethiopia | 1990 | 1.908912  | 2.1503562 |
| Ethiopia | 1991 | 1.9051844 | 2.1030857 |
| Ethiopia | 1992 | 1.9013543 | 2.0484021 |
| Ethiopia | 1993 | 1.8978439 | 2.0868543 |
| Ethiopia | 1994 | 1.8928601 | 2.0857525 |

|          |      |           |           |
|----------|------|-----------|-----------|
| Ethiopia | 1995 | 1.8879645 | 2.0974651 |
| Ethiopia | 1996 | 1.8832658 | 2.1348966 |
| Ethiopia | 1997 | 1.8783358 | 2.1354278 |
| Ethiopia | 1998 | 1.8734742 | 2.1076392 |
| Ethiopia | 1999 | 1.8682831 | 2.1171068 |
| Ethiopia | 2000 | 1.8629113 | 2.1302648 |
| Ethiopia | 2001 | 1.8568651 | 2.1523688 |
| Ethiopia | 2002 | 1.8504598 | 2.1463537 |
| Ethiopia | 2003 | 1.8436053 | 2.1243726 |
| Ethiopia | 2004 | 1.8362776 | 2.1672957 |
| Ethiopia | 2005 | 1.8285536 | 2.2036622 |
| Ethiopia | 2006 | 1.8207527 | 2.236396  |
| Ethiopia | 2007 | 1.8130148 | 2.2717335 |
| Ethiopia | 2008 | 1.8056864 | 2.3046129 |
| Finland  | 1990 | 1.8824204 | 4.4490596 |
| Finland  | 1991 | 1.8857889 | 4.4198158 |
| Finland  | 1992 | 1.8730451 | 4.4019703 |
| Finland  | 1993 | 1.8478563 | 4.3963338 |
| Finland  | 1994 | 1.8454642 | 4.4100467 |
| Finland  | 1995 | 1.8316337 | 4.4252657 |
| Finland  | 1996 | 1.8307743 | 4.4390727 |
| Finland  | 1997 | 1.8270928 | 4.4639294 |
| Finland  | 1998 | 1.8237263 | 4.4840942 |
| Finland  | 1999 | 1.819736  | 4.4997367 |
| Finland  | 2000 | 1.8198208 | 4.5213613 |
| Finland  | 2001 | 1.8204897 | 4.5301791 |
| Finland  | 2002 | 1.8204025 | 4.5370199 |
| Finland  | 2003 | 1.8346973 | 4.5446374 |
| Finland  | 2004 | 1.8396096 | 4.5609309 |
| Finland  | 2005 | 1.8239887 | 4.5719276 |
| Finland  | 2006 | 1.8357614 | 4.5890055 |
| Finland  | 2007 | 1.8302476 | 4.6097315 |
| Finland  | 2008 | 1.8246704 | 4.6089827 |
| France   | 1990 | 1.7939949 | 4.4440612 |
| France   | 1991 | 1.7965174 | 4.4474537 |
| France   | 1992 | 1.7893755 | 4.4516641 |
| France   | 1993 | 1.7808488 | 4.4468721 |
| France   | 1994 | 1.7763357 | 4.4549055 |
| France   | 1995 | 1.7783119 | 4.4621365 |
| France   | 1996 | 1.7768103 | 4.46521   |
| France   | 1997 | 1.7695963 | 4.4730557 |
| France   | 1998 | 1.7725587 | 4.4858845 |
| France   | 1999 | 1.7666016 | 4.4977177 |
| France   | 2000 | 1.7661078 | 4.5104399 |
| France   | 2001 | 1.7659479 | 4.5151809 |
| France   | 2002 | 1.7649909 | 4.5160401 |
| France   | 2003 | 1.7661305 | 4.5168534 |

|           |      |           |           |
|-----------|------|-----------|-----------|
| France    | 2004 | 1.7646439 | 4.5245712 |
| France    | 2005 | 1.7636459 | 4.5291604 |
| France    | 2006 | 1.7578054 | 4.5367178 |
| France    | 2007 | 1.7559585 | 4.5438452 |
| France    | 2008 | 1.7561467 | 4.5410691 |
| Germany   | 1990 | 1.8542495 | 4.4456177 |
| Germany   | 1991 | 1.8482246 | 4.4640903 |
| Germany   | 1992 | 1.8434892 | 4.469013  |
| Germany   | 1993 | 1.838136  | 4.461784  |
| Germany   | 1994 | 1.8338018 | 4.4708817 |
| Germany   | 1995 | 1.8317023 | 4.4768281 |
| Germany   | 1996 | 1.8269665 | 4.4789917 |
| Germany   | 1997 | 1.8201434 | 4.4858364 |
| Germany   | 1998 | 1.8180002 | 4.4937822 |
| Germany   | 1999 | 1.8074166 | 4.5015524 |
| Germany   | 2000 | 1.8066745 | 4.5140444 |
| Germany   | 2001 | 1.8037136 | 4.5198414 |
| Germany   | 2002 | 1.801152  | 4.5191553 |
| Germany   | 2003 | 1.8053755 | 4.5172812 |
| Germany   | 2004 | 1.8059316 | 4.5223892 |
| Germany   | 2005 | 1.8011738 | 4.5255991 |
| Germany   | 2006 | 1.8022149 | 4.5418677 |
| Germany   | 2007 | 1.798439  | 4.5564186 |
| Germany   | 2008 | 1.7981937 | 4.5619234 |
| Greece    | 1990 | 1.7805653 | 4.1870703 |
| Greece    | 1991 | 1.7750803 | 4.1960999 |
| Greece    | 1992 | 1.7770414 | 4.1943466 |
| Greece    | 1993 | 1.775294  | 4.1833537 |
| Greece    | 1994 | 1.7748461 | 4.1883376 |
| Greece    | 1995 | 1.7768199 | 4.1940272 |
| Greece    | 1996 | 1.7758053 | 4.2011071 |
| Greece    | 1997 | 1.7719037 | 4.2139025 |
| Greece    | 1998 | 1.7770335 | 4.2259243 |
| Greece    | 1999 | 1.7793062 | 4.2386185 |
| Greece    | 2000 | 1.786888  | 4.2562503 |
| Greece    | 2001 | 1.7852957 | 4.2728163 |
| Greece    | 2002 | 1.784342  | 4.2860142 |
| Greece    | 2003 | 1.786968  | 4.3096702 |
| Greece    | 2004 | 1.7874095 | 4.326734  |
| Greece    | 2005 | 1.7871636 | 4.3348701 |
| Greece    | 2006 | 1.7865369 | 4.3564167 |
| Greece    | 2007 | 1.788524  | 4.3697864 |
| Greece    | 2008 | 1.7864221 | 4.3671345 |
| Guatemala | 1990 | 1.7938064 | 3.2459079 |
| Guatemala | 1991 | 1.7899558 | 3.2514544 |
| Guatemala | 1992 | 1.7870017 | 3.2618641 |
| Guatemala | 1993 | 1.7840685 | 3.2684696 |

|           |      |           |           |
|-----------|------|-----------|-----------|
| Guatemala | 1994 | 1.7812836 | 3.2755634 |
| Guatemala | 1995 | 1.7775195 | 3.2865308 |
| Guatemala | 1996 | 1.7731598 | 3.2892661 |
| Guatemala | 1997 | 1.7707754 | 3.2979384 |
| Guatemala | 1998 | 1.7685324 | 3.3091801 |
| Guatemala | 1999 | 1.7648554 | 3.315503  |
| Guatemala | 2000 | 1.7621773 | 3.320613  |
| Guatemala | 2001 | 1.7598797 | 3.3201036 |
| Guatemala | 2002 | 1.7586699 | 3.3258639 |
| Guatemala | 2003 | 1.7539825 | 3.3258882 |
| Guatemala | 2004 | 1.7523888 | 3.3285229 |
| Guatemala | 2005 | 1.750933  | 3.331666  |
| Guatemala | 2006 | 1.7491346 | 3.3437165 |
| Guatemala | 2007 | 1.7476129 | 3.3596184 |
| Guatemala | 2008 | 1.7458215 | 3.3629972 |
| Hong Kong | 1990 | 1.7084975 | 4.2446753 |
| Hong Kong | 1991 | 1.7058833 | 4.265157  |
| Hong Kong | 1992 | 1.708766  | 4.2877778 |
| Hong Kong | 1993 | 1.892822  | 4.3064472 |
| Hong Kong | 1994 | 1.9059931 | 4.3221203 |
| Hong Kong | 1995 | 1.8971975 | 4.3237093 |
| Hong Kong | 1996 | 1.866705  | 4.3225443 |
| Hong Kong | 1997 | 1.8740005 | 4.3405297 |
| Hong Kong | 1998 | 1.842131  | 4.3105743 |
| Hong Kong | 1999 | 1.8249637 | 4.3171783 |
| Hong Kong | 2000 | 1.8272064 | 4.3454178 |
| Hong Kong | 2001 | 1.8339212 | 4.3446463 |
| Hong Kong | 2002 | 1.8151705 | 4.3498591 |
| Hong Kong | 2003 | 1.7979987 | 4.363791  |
| Hong Kong | 2004 | 1.7920569 | 4.3966338 |
| Hong Kong | 2005 | 1.7963991 | 4.4256932 |
| Hong Kong | 2006 | 1.7884947 | 4.45242   |
| Hong Kong | 2007 | 1.7955643 | 4.4758927 |
| Hong Kong | 2008 | 1.7955974 | 4.4824389 |
| India     | 1990 | 1.821134  | 2.6054023 |
| India     | 1991 | 1.8191795 | 2.6013286 |
| India     | 1992 | 1.8171875 | 2.616065  |
| India     | 1993 | 1.8148488 | 2.6279601 |
| India     | 1994 | 1.8128311 | 2.6478553 |
| India     | 1995 | 1.8105283 | 2.6716079 |
| India     | 1996 | 1.8082616 | 2.6954067 |
| India     | 1997 | 1.8057026 | 2.7049897 |
| India     | 1998 | 1.8029744 | 2.7235362 |
| India     | 1999 | 1.8009029 | 2.7529689 |
| India     | 2000 | 1.7978516 | 2.762091  |
| India     | 2001 | 1.795193  | 2.7754271 |
| India     | 2002 | 1.792556  | 2.7846454 |

|                           |      |           |           |
|---------------------------|------|-----------|-----------|
| India                     | 2003 | 1.7902802 | 2.8106717 |
| India                     | 2004 | 1.7880191 | 2.83715   |
| India                     | 2005 | 1.785692  | 2.8692988 |
| India                     | 2006 | 1.7838211 | 2.9015988 |
| India                     | 2007 | 1.7825359 | 2.9362436 |
| India                     | 2008 | 1.7811469 | 2.9470274 |
| Indonesia                 | 1990 | 1.7861019 | 2.9243933 |
| Indonesia                 | 1991 | 1.7844799 | 2.9539331 |
| Indonesia                 | 1992 | 1.7823193 | 2.9767956 |
| Indonesia                 | 1993 | 1.7804846 | 2.9999835 |
| Indonesia                 | 1994 | 1.7782214 | 3.0245281 |
| Indonesia                 | 1995 | 1.7761442 | 3.0527173 |
| Indonesia                 | 1996 | 1.7743055 | 3.0780739 |
| Indonesia                 | 1997 | 1.7725372 | 3.0915625 |
| Indonesia                 | 1998 | 1.7639295 | 3.0241116 |
| Indonesia                 | 1999 | 1.7652034 | 3.0212554 |
| Indonesia                 | 2000 | 1.7640102 | 3.0358502 |
| Indonesia                 | 2001 | 1.7625765 | 3.0451358 |
| Indonesia                 | 2002 | 1.7618329 | 3.0580093 |
| Indonesia                 | 2003 | 1.7599164 | 3.0720585 |
| Indonesia                 | 2004 | 1.7592989 | 3.0871528 |
| Indonesia                 | 2005 | 1.7578533 | 3.1049871 |
| Indonesia                 | 2006 | 1.7560683 | 3.1220411 |
| Indonesia                 | 2007 | 1.7549931 | 3.1425792 |
| Indonesia                 | 2008 | 1.7538019 | 3.1618345 |
| Iran, Islamic Republic of | 1990 | 1.8206382 | 3.2555769 |
| Iran, Islamic Republic of | 1991 | 1.8125637 | 3.2986204 |
| Iran, Islamic Republic of | 1992 | 1.807398  | 3.3104354 |
| Iran, Islamic Republic of | 1993 | 1.7944484 | 3.2985387 |
| Iran, Islamic Republic of | 1994 | 1.7985244 | 3.2920304 |
| Iran, Islamic Republic of | 1995 | 1.7950864 | 3.2975785 |
| Iran, Islamic Republic of | 1996 | 1.7932739 | 3.3204416 |
| Iran, Islamic Republic of | 1997 | 1.7925648 | 3.3271803 |
| Iran, Islamic Republic of | 1998 | 1.7943582 | 3.3308671 |
| Iran, Islamic Republic of | 1999 | 1.7851326 | 3.3314475 |
| Iran, Islamic Republic of | 2000 | 1.7847488 | 3.3462389 |
| Iran, Islamic Republic of | 2001 | 1.7848109 | 3.3556979 |
| Iran, Islamic Republic of | 2002 | 1.7803781 | 3.3815568 |
| Iran, Islamic Republic of | 2003 | 1.7900831 | 3.4062052 |
| Iran, Islamic Republic of | 2004 | 1.7904486 | 3.422709  |
| Iran, Islamic Republic of | 2005 | 1.7890494 | 3.4372926 |
| Iran, Islamic Republic of | 2006 | 1.7880901 | 3.457091  |
| Iran, Islamic Republic of | 2007 | 1.7867478 | 3.4847445 |
| Iran, Islamic Republic of | 2008 | 1.7872346 | 3.4821357 |
| Ireland                   | 1990 | 1.8224694 | 4.3460686 |
| Ireland                   | 1991 | 1.8259363 | 4.3518722 |
| Ireland                   | 1992 | 1.8194632 | 4.3631914 |

|         |      |           |           |
|---------|------|-----------|-----------|
| Ireland | 1993 | 1.8143491 | 4.3725598 |
| Ireland | 1994 | 1.8161464 | 4.3951522 |
| Ireland | 1995 | 1.8197297 | 4.4328725 |
| Ireland | 1996 | 1.8368645 | 4.4696506 |
| Ireland | 1997 | 1.8414463 | 4.5116803 |
| Ireland | 1998 | 1.8448385 | 4.5443024 |
| Ireland | 1999 | 1.8412909 | 4.5846173 |
| Ireland | 2000 | 1.8377638 | 4.6227729 |
| Ireland | 2001 | 1.8344159 | 4.6369857 |
| Ireland | 2002 | 1.8309473 | 4.6525785 |
| Ireland | 2003 | 1.8442531 | 4.6614073 |
| Ireland | 2004 | 1.8462986 | 4.6713339 |
| Ireland | 2005 | 1.844122  | 4.6875074 |
| Ireland | 2006 | 1.8385439 | 4.6990171 |
| Ireland | 2007 | 1.8337507 | 4.7075832 |
| Ireland | 2008 | 1.8285739 | 4.689244  |
| Italy   | 1990 | 1.8011076 | 4.4078352 |
| Italy   | 1991 | 1.8034718 | 4.4141651 |
| Italy   | 1992 | 1.8001483 | 4.4174783 |
| Italy   | 1993 | 1.7857324 | 4.4134932 |
| Italy   | 1994 | 1.7825944 | 4.4226474 |
| Italy   | 1995 | 1.7860935 | 4.4350003 |
| Italy   | 1996 | 1.776955  | 4.4397784 |
| Italy   | 1997 | 1.775424  | 4.4475779 |
| Italy   | 1998 | 1.7752051 | 4.4536972 |
| Italy   | 1999 | 1.7727065 | 4.4598809 |
| Italy   | 2000 | 1.7755629 | 4.4752685 |
| Italy   | 2001 | 1.7719994 | 4.4830157 |
| Italy   | 2002 | 1.7732765 | 4.4836005 |
| Italy   | 2003 | 1.7755155 | 4.4800131 |
| Italy   | 2004 | 1.774075  | 4.4831839 |
| Italy   | 2005 | 1.7761008 | 4.4839985 |
| Italy   | 2006 | 1.7753435 | 4.4909735 |
| Italy   | 2007 | 1.7733086 | 4.4950375 |
| Italy   | 2008 | 1.7708234 | 4.4866577 |
| Japan   | 1990 | 1.7950736 | 4.4938067 |
| Japan   | 1991 | 1.7955403 | 4.5066615 |
| Japan   | 1992 | 1.79731   | 4.5091259 |
| Japan   | 1993 | 1.7947622 | 4.5087963 |
| Japan   | 1994 | 1.7971803 | 4.5110511 |
| Japan   | 1995 | 1.8006012 | 4.5177476 |
| Japan   | 1996 | 1.7956022 | 4.5278241 |
| Japan   | 1997 | 1.7932132 | 4.5335611 |
| Japan   | 1998 | 1.7859524 | 4.5236758 |
| Japan   | 1999 | 1.7848139 | 4.5219855 |
| Japan   | 2000 | 1.7880675 | 4.5309269 |
| Japan   | 2001 | 1.7833829 | 4.5315139 |

|                                 |      |           |           |
|---------------------------------|------|-----------|-----------|
| Japan                           | 2002 | 1.7823536 | 4.5317597 |
| Japan                           | 2003 | 1.7824557 | 4.5380878 |
| Japan                           | 2004 | 1.7839209 | 4.548075  |
| Japan                           | 2005 | 1.783206  | 4.5536553 |
| Japan                           | 2006 | 1.7794488 | 4.5610038 |
| Japan                           | 2007 | 1.7796993 | 4.5703713 |
| Japan                           | 2008 | 1.7809374 | 4.5660506 |
| Korea                           | 1990 | 1.7984443 | 3.9429224 |
| Korea                           | 1991 | 1.8012006 | 3.9776141 |
| Korea                           | 1992 | 1.8022423 | 3.9978973 |
| Korea                           | 1993 | 1.8060747 | 4.0193393 |
| Korea                           | 1994 | 1.810549  | 4.0505455 |
| Korea                           | 1995 | 1.8163774 | 4.0842748 |
| Korea                           | 1996 | 1.8199228 | 4.1095151 |
| Korea                           | 1997 | 1.8169168 | 4.1251858 |
| Korea                           | 1998 | 1.7857261 | 4.0912129 |
| Korea                           | 1999 | 1.7974519 | 4.1274858 |
| Korea                           | 2000 | 1.8064204 | 4.1592288 |
| Korea                           | 2001 | 1.7998019 | 4.1729367 |
| Korea                           | 2002 | 1.8064462 | 4.2005072 |
| Korea                           | 2003 | 1.8025044 | 4.2103548 |
| Korea                           | 2004 | 1.8030159 | 4.2283342 |
| Korea                           | 2005 | 1.802279  | 4.2442976 |
| Korea                           | 2006 | 1.8026488 | 4.2641205 |
| Korea                           | 2007 | 1.8056059 | 4.2837255 |
| Korea                           | 2008 | 1.8006638 | 4.2904684 |
| Lao Peoples Democratic Republic | 1990 | 1.8479367 | 2.4175368 |
| Lao Peoples Democratic Republic | 1991 | 1.8418333 | 2.4231599 |
| Lao Peoples Democratic Republic | 1992 | 1.8356346 | 2.4341314 |
| Lao Peoples Democratic Republic | 1993 | 1.8294953 | 2.4468891 |
| Lao Peoples Democratic Republic | 1994 | 1.823852  | 2.4693464 |
| Lao Peoples Democratic Republic | 1995 | 1.8181102 | 2.4879948 |
| Lao Peoples Democratic Republic | 1996 | 1.8127391 | 2.5069439 |
| Lao Peoples Democratic Republic | 1997 | 1.8075022 | 2.5263209 |
| Lao Peoples Democratic Republic | 1998 | 1.8025941 | 2.5344318 |
| Lao Peoples Democratic Republic | 1999 | 1.7973375 | 2.5570117 |
| Lao Peoples Democratic Republic | 2000 | 1.7941973 | 2.5741661 |
| Lao Peoples Democratic Republic | 2001 | 1.7891883 | 2.5919017 |
| Lao Peoples Democratic Republic | 2002 | 1.7857324 | 2.6109546 |
| Lao Peoples Democratic Republic | 2003 | 1.7815143 | 2.6307912 |
| Lao Peoples Democratic Republic | 2004 | 1.7780916 | 2.6514173 |
| Lao Peoples Democratic Republic | 2005 | 1.7746576 | 2.6743177 |
| Lao Peoples Democratic Republic | 2006 | 1.771576  | 2.7023992 |
| Lao Peoples Democratic Republic | 2007 | 1.7685062 | 2.7256397 |
| Lao Peoples Democratic Republic | 2008 | 1.7654234 | 2.7493635 |
| Madagascar                      | 1990 | 1.8734408 | 2.5164255 |
| Madagascar                      | 1991 | 1.8684822 | 2.4750605 |

|            |      |           |           |
|------------|------|-----------|-----------|
| Madagascar | 1992 | 1.8627357 | 2.4670368 |
| Madagascar | 1993 | 1.8567428 | 2.4627966 |
| Madagascar | 1994 | 1.8505085 | 2.4490959 |
| Madagascar | 1995 | 1.8440082 | 2.4429346 |
| Madagascar | 1996 | 1.837323  | 2.4384999 |
| Madagascar | 1997 | 1.8313374 | 2.4405006 |
| Madagascar | 1998 | 1.8254759 | 2.443499  |
| Madagascar | 1999 | 1.8200584 | 2.4496168 |
| Madagascar | 2000 | 1.814698  | 2.4563098 |
| Madagascar | 2001 | 1.8100603 | 2.4683533 |
| Madagascar | 2002 | 1.8056376 | 2.3963183 |
| Madagascar | 2003 | 1.8023734 | 2.4238432 |
| Madagascar | 2004 | 1.7984317 | 2.433239  |
| Madagascar | 2005 | 1.7956253 | 2.4400849 |
| Madagascar | 2006 | 1.7925024 | 2.4488297 |
| Madagascar | 2007 | 1.7895502 | 2.4627291 |
| Madagascar | 2008 | 1.7866392 | 2.4803488 |
| Malawi     | 1990 | 1.9084696 | 2.2767282 |
| Malawi     | 1991 | 1.9079482 | 2.3035126 |
| Malawi     | 1992 | 1.908162  | 2.2658787 |
| Malawi     | 1993 | 1.9091327 | 2.3042234 |
| Malawi     | 1994 | 1.910772  | 2.2550468 |
| Malawi     | 1995 | 1.9125087 | 2.3173011 |
| Malawi     | 1996 | 1.9148208 | 2.3397971 |
| Malawi     | 1997 | 1.9169264 | 2.3453594 |
| Malawi     | 1998 | 1.918299  | 2.3497752 |
| Malawi     | 1999 | 1.9195223 | 2.3502876 |
| Malawi     | 2000 | 1.9185074 | 2.3450693 |
| Malawi     | 2001 | 1.9161542 | 2.3114868 |
| Malawi     | 2002 | 1.9121101 | 2.307609  |
| Malawi     | 2003 | 1.9064942 | 2.3196479 |
| Malawi     | 2004 | 1.8996923 | 2.328656  |
| Malawi     | 2005 | 1.8918672 | 2.3286989 |
| Malawi     | 2006 | 1.8834949 | 2.3248874 |
| Malawi     | 2007 | 1.8750713 | 2.3512086 |
| Malawi     | 2008 | 1.8671781 | 2.3727553 |
| Malaysia   | 1990 | 1.7684106 | 3.4979089 |
| Malaysia   | 1991 | 1.7706978 | 3.5257665 |
| Malaysia   | 1992 | 1.7710097 | 3.5513911 |
| Malaysia   | 1993 | 1.7749237 | 3.5812883 |
| Malaysia   | 1994 | 1.774498  | 3.6085641 |
| Malaysia   | 1995 | 1.7816108 | 3.6382712 |
| Malaysia   | 1996 | 1.78112   | 3.6686171 |
| Malaysia   | 1997 | 1.7822321 | 3.6882959 |
| Malaysia   | 1998 | 1.7628108 | 3.6442942 |
| Malaysia   | 1999 | 1.7633573 | 3.6597787 |
| Malaysia   | 2000 | 1.7680941 | 3.6868022 |

|           |      |           |           |
|-----------|------|-----------|-----------|
| Malaysia  | 2001 | 1.7687439 | 3.6797801 |
| Malaysia  | 2002 | 1.770643  | 3.6938137 |
| Malaysia  | 2003 | 1.7735332 | 3.7098511 |
| Malaysia  | 2004 | 1.7750997 | 3.7301549 |
| Malaysia  | 2005 | 1.7754908 | 3.7446015 |
| Malaysia  | 2006 | 1.7769756 | 3.7601516 |
| Malaysia  | 2007 | 1.7783097 | 3.7787227 |
| Malaysia  | 2008 | 1.7770067 | 3.7913757 |
| Mauritius | 1990 | 1.7699071 | 3.4825107 |
| Mauritius | 1991 | 1.7669214 | 3.4966706 |
| Mauritius | 1992 | 1.7673884 | 3.5183578 |
| Mauritius | 1993 | 1.7684593 | 3.5347376 |
| Mauritius | 1994 | 1.7661151 | 3.5462587 |
| Mauritius | 1995 | 1.764729  | 3.5607573 |
| Mauritius | 1996 | 1.7683344 | 3.5799294 |
| Mauritius | 1997 | 1.7676842 | 3.5985152 |
| Mauritius | 1998 | 1.7661413 | 3.619544  |
| Mauritius | 1999 | 1.7675207 | 3.6252161 |
| Mauritius | 2000 | 1.767819  | 3.6584809 |
| Mauritius | 2001 | 1.7658445 | 3.6647824 |
| Mauritius | 2002 | 1.7627737 | 3.6701473 |
| Mauritius | 2003 | 1.7682482 | 3.6812417 |
| Mauritius | 2004 | 1.7689091 | 3.701765  |
| Mauritius | 2005 | 1.7676672 | 3.7036626 |
| Mauritius | 2006 | 1.7711458 | 3.7171904 |
| Mauritius | 2007 | 1.7714674 | 3.7393801 |
| Mauritius | 2008 | 1.7747186 | 3.7598787 |
| Mexico    | 1990 | 1.7779865 | 3.8165722 |
| Mexico    | 1991 | 1.774879  | 3.8254799 |
| Mexico    | 1992 | 1.7744024 | 3.8318269 |
| Mexico    | 1993 | 1.7685895 | 3.8400389 |
| Mexico    | 1994 | 1.7678727 | 3.8512449 |
| Mexico    | 1995 | 1.757793  | 3.8169761 |
| Mexico    | 1996 | 1.7562947 | 3.8336103 |
| Mexico    | 1997 | 1.756912  | 3.8550193 |
| Mexico    | 1998 | 1.755528  | 3.8675325 |
| Mexico    | 1999 | 1.7526759 | 3.8719549 |
| Mexico    | 2000 | 1.7527534 | 3.8878104 |
| Mexico    | 2001 | 1.7513211 | 3.8790852 |
| Mexico    | 2002 | 1.7488098 | 3.8739898 |
| Mexico    | 2003 | 1.7495658 | 3.8747354 |
| Mexico    | 2004 | 1.7477622 | 3.887708  |
| Mexico    | 2005 | 1.749247  | 3.8953541 |
| Mexico    | 2006 | 1.7484731 | 3.9111513 |
| Mexico    | 2007 | 1.7482643 | 3.9191734 |
| Mexico    | 2008 | 1.7473305 | 3.9197455 |
| Morocco   | 1990 | 1.7803776 | 3.1717341 |

|             |      |           |           |
|-------------|------|-----------|-----------|
| Morocco     | 1991 | 1.7772565 | 3.1927504 |
| Morocco     | 1992 | 1.7742484 | 3.1672615 |
| Morocco     | 1993 | 1.7727548 | 3.1555321 |
| Morocco     | 1994 | 1.7708014 | 3.1913027 |
| Morocco     | 1995 | 1.76978   | 3.154968  |
| Morocco     | 1996 | 1.7665113 | 3.198477  |
| Morocco     | 1997 | 1.764292  | 3.1823767 |
| Morocco     | 1998 | 1.7632615 | 3.2083821 |
| Morocco     | 1999 | 1.7627417 | 3.204992  |
| Morocco     | 2000 | 1.7616528 | 3.2065532 |
| Morocco     | 2001 | 1.7612971 | 3.2332339 |
| Morocco     | 2002 | 1.7610047 | 3.2427652 |
| Morocco     | 2003 | 1.7590047 | 3.2649644 |
| Morocco     | 2004 | 1.7587951 | 3.2810773 |
| Morocco     | 2005 | 1.7601276 | 3.289634  |
| Morocco     | 2006 | 1.7580806 | 3.3179855 |
| Morocco     | 2007 | 1.756894  | 3.3255174 |
| Morocco     | 2008 | 1.7557267 | 3.3449051 |
| Mozambique  | 1990 | 1.9421348 | 2.2715673 |
| Mozambique  | 1991 | 1.9386874 | 2.2820442 |
| Mozambique  | 1992 | 1.9345209 | 2.2452362 |
| Mozambique  | 1993 | 1.9301094 | 2.2651619 |
| Mozambique  | 1994 | 1.9250474 | 2.2775555 |
| Mozambique  | 1995 | 1.9208782 | 2.2745356 |
| Mozambique  | 1996 | 1.9157739 | 2.2926391 |
| Mozambique  | 1997 | 1.9117263 | 2.3232304 |
| Mozambique  | 1998 | 1.9089209 | 2.3566447 |
| Mozambique  | 1999 | 1.9077965 | 2.379486  |
| Mozambique  | 2000 | 1.9064351 | 2.3727001 |
| Mozambique  | 2001 | 1.9054599 | 2.4095702 |
| Mozambique  | 2002 | 1.904783  | 2.4340899 |
| Mozambique  | 2003 | 1.9040977 | 2.4472242 |
| Mozambique  | 2004 | 1.9032552 | 2.4715516 |
| Mozambique  | 2005 | 1.9026588 | 2.4956941 |
| Mozambique  | 2006 | 1.9010792 | 2.5105492 |
| Mozambique  | 2007 | 1.8991645 | 2.5294815 |
| Mozambique  | 2008 | 1.8969705 | 2.5467459 |
| Netherlands | 1990 | 1.8270945 | 4.4666169 |
| Netherlands | 1991 | 1.828017  | 4.4736601 |
| Netherlands | 1992 | 1.8248193 | 4.4777234 |
| Netherlands | 1993 | 1.8283212 | 4.4801241 |
| Netherlands | 1994 | 1.8222766 | 4.4901787 |
| Netherlands | 1995 | 1.8285477 | 4.5013596 |
| Netherlands | 1996 | 1.8261393 | 4.5139037 |
| Netherlands | 1997 | 1.820302  | 4.5298626 |
| Netherlands | 1998 | 1.8204856 | 4.5438982 |
| Netherlands | 1999 | 1.8077894 | 4.5608899 |

|             |      |           |           |
|-------------|------|-----------|-----------|
| Netherlands | 2000 | 1.8060749 | 4.5745727 |
| Netherlands | 2001 | 1.8017145 | 4.5795789 |
| Netherlands | 2002 | 1.8095684 | 4.5771381 |
| Netherlands | 2003 | 1.8078652 | 4.5765441 |
| Netherlands | 2004 | 1.8069483 | 4.5846411 |
| Netherlands | 2005 | 1.8045495 | 4.5924243 |
| Netherlands | 2006 | 1.805869  | 4.6062229 |
| Netherlands | 2007 | 1.8033157 | 4.62198   |
| Netherlands | 2008 | 1.8039408 | 4.6280544 |
| New Zealand | 1990 | 1.7807393 | 4.3202415 |
| New Zealand | 1991 | 1.7740413 | 4.2943012 |
| New Zealand | 1992 | 1.7752591 | 4.2937654 |
| New Zealand | 1993 | 1.7731538 | 4.3149251 |
| New Zealand | 1994 | 1.774865  | 4.3299841 |
| New Zealand | 1995 | 1.7769105 | 4.3415105 |
| New Zealand | 1996 | 1.7818886 | 4.348936  |
| New Zealand | 1997 | 1.7807615 | 4.3558339 |
| New Zealand | 1998 | 1.769679  | 4.3580057 |
| New Zealand | 1999 | 1.7820976 | 4.3778102 |
| New Zealand | 2000 | 1.7753744 | 4.38557   |
| New Zealand | 2001 | 1.7747666 | 4.3989141 |
| New Zealand | 2002 | 1.7758143 | 4.4125484 |
| New Zealand | 2003 | 1.7721008 | 4.4212601 |
| New Zealand | 2004 | 1.7729777 | 4.4304265 |
| New Zealand | 2005 | 1.7721922 | 4.4399136 |
| New Zealand | 2006 | 1.7666582 | 4.4417279 |
| New Zealand | 2007 | 1.7659262 | 4.4522502 |
| New Zealand | 2008 | 1.7657931 | 4.4403835 |
| Nicaragua   | 1990 | 1.7797748 | 2.9719249 |
| Nicaragua   | 1991 | 1.7733937 | 2.9607899 |
| Nicaragua   | 1992 | 1.7696533 | 2.9518133 |
| Nicaragua   | 1993 | 1.7655626 | 2.9394367 |
| Nicaragua   | 1994 | 1.7625328 | 2.9434004 |
| Nicaragua   | 1995 | 1.7595249 | 2.9587008 |
| Nicaragua   | 1996 | 1.7566733 | 2.9764508 |
| Nicaragua   | 1997 | 1.7541478 | 2.9849678 |
| Nicaragua   | 1998 | 1.7521206 | 2.9929807 |
| Nicaragua   | 1999 | 1.7498455 | 3.0152047 |
| Nicaragua   | 2000 | 1.7476264 | 3.0258106 |
| Nicaragua   | 2001 | 1.744941  | 3.0320795 |
| Nicaragua   | 2002 | 1.7419813 | 3.0293517 |
| Nicaragua   | 2003 | 1.7399034 | 3.0344666 |
| Nicaragua   | 2004 | 1.7371419 | 3.051393  |
| Nicaragua   | 2005 | 1.73435   | 3.0640823 |
| Nicaragua   | 2006 | 1.7320723 | 3.0762359 |
| Nicaragua   | 2007 | 1.7297731 | 3.0920301 |
| Nicaragua   | 2008 | 1.7274229 | 3.1034571 |

|          |      |           |           |
|----------|------|-----------|-----------|
| Nigeria  | 1990 | 1.9209319 | 2.7708902 |
| Nigeria  | 1991 | 1.9208685 | 2.7571311 |
| Nigeria  | 1992 | 1.9227167 | 2.7480504 |
| Nigeria  | 1993 | 1.9222484 | 2.7461526 |
| Nigeria  | 1994 | 1.9210402 | 2.739241  |
| Nigeria  | 1995 | 1.9196138 | 2.7270668 |
| Nigeria  | 1996 | 1.9195761 | 2.737386  |
| Nigeria  | 1997 | 1.9191776 | 2.7385348 |
| Nigeria  | 1998 | 1.9182751 | 2.7393047 |
| Nigeria  | 1999 | 1.915468  | 2.7304803 |
| Nigeria  | 2000 | 1.9142248 | 2.7420861 |
| Nigeria  | 2001 | 1.9130816 | 2.7499145 |
| Nigeria  | 2002 | 1.9110335 | 2.75509   |
| Nigeria  | 2003 | 1.9076211 | 2.786844  |
| Nigeria  | 2004 | 1.9040284 | 2.9019352 |
| Nigeria  | 2005 | 1.9000362 | 2.9053383 |
| Nigeria  | 2006 | 1.8928674 | 2.9281598 |
| Nigeria  | 2007 | 1.8887227 | 2.9452674 |
| Nigeria  | 2008 | 1.8834409 | 2.9599746 |
| Norway   | 1990 | 1.850308  | 4.6502068 |
| Norway   | 1991 | 1.847765  | 4.661419  |
| Norway   | 1992 | 1.8392806 | 4.6739498 |
| Norway   | 1993 | 1.8334117 | 4.6833012 |
| Norway   | 1994 | 1.8320339 | 4.7022303 |
| Norway   | 1995 | 1.8274307 | 4.7177866 |
| Norway   | 1996 | 1.823535  | 4.737187  |
| Norway   | 1997 | 1.8233023 | 4.7576424 |
| Norway   | 1998 | 1.8274833 | 4.766554  |
| Norway   | 1999 | 1.8278529 | 4.7722901 |
| Norway   | 2000 | 1.820848  | 4.7833765 |
| Norway   | 2001 | 1.8232984 | 4.7897365 |
| Norway   | 2002 | 1.8182894 | 4.7938694 |
| Norway   | 2003 | 1.824786  | 4.7955613 |
| Norway   | 2004 | 1.8342154 | 4.8098655 |
| Norway   | 2005 | 1.8560006 | 4.8180082 |
| Norway   | 2006 | 1.8210925 | 4.8243808 |
| Norway   | 2007 | 1.8207179 | 4.8312588 |
| Norway   | 2008 | 1.8176356 | 4.8261394 |
| Pakistan | 1990 | 1.8008774 | 2.7200968 |
| Pakistan | 1991 | 1.7986035 | 2.7294421 |
| Pakistan | 1992 | 1.7969098 | 2.7501926 |
| Pakistan | 1993 | 1.795058  | 2.7466279 |
| Pakistan | 1994 | 1.7936229 | 2.7514671 |
| Pakistan | 1995 | 1.7916757 | 2.7612552 |
| Pakistan | 1996 | 1.7905736 | 2.7703275 |
| Pakistan | 1997 | 1.7883969 | 2.7631354 |
| Pakistan | 1998 | 1.7863026 | 2.7627084 |

|          |      |           |           |
|----------|------|-----------|-----------|
| Pakistan | 1999 | 1.7848456 | 2.7675573 |
| Pakistan | 2000 | 1.7833079 | 2.7757446 |
| Pakistan | 2001 | 1.7811596 | 2.7752309 |
| Pakistan | 2002 | 1.7796053 | 2.7807048 |
| Pakistan | 2003 | 1.7780059 | 2.7934196 |
| Pakistan | 2004 | 1.7776444 | 2.8165829 |
| Pakistan | 2005 | 1.7766715 | 2.8408439 |
| Pakistan | 2006 | 1.7758835 | 2.8588834 |
| Pakistan | 2007 | 1.7753386 | 2.8712984 |
| Pakistan | 2008 | 1.7745282 | 2.8705418 |
| Panama   | 1990 | 1.7288847 | 3.487633  |
| Panama   | 1991 | 1.7273762 | 3.5176758 |
| Panama   | 1992 | 1.7269471 | 3.5429419 |
| Panama   | 1993 | 1.7260395 | 3.5570897 |
| Panama   | 1994 | 1.726101  | 3.5603755 |
| Panama   | 1995 | 1.7236465 | 3.5589758 |
| Panama   | 1996 | 1.7252265 | 3.5620459 |
| Panama   | 1997 | 1.7257021 | 3.5802624 |
| Panama   | 1998 | 1.7260749 | 3.6020823 |
| Panama   | 1999 | 1.7273243 | 3.6098906 |
| Panama   | 2000 | 1.725503  | 3.6127476 |
| Panama   | 2001 | 1.7247478 | 3.6065646 |
| Panama   | 2002 | 1.7233223 | 3.6075773 |
| Panama   | 2003 | 1.7162959 | 3.6170315 |
| Panama   | 2004 | 1.7175954 | 3.6402294 |
| Panama   | 2005 | 1.7116539 | 3.6622365 |
| Panama   | 2006 | 1.71153   | 3.689777  |
| Panama   | 2007 | 1.7104251 | 3.7315829 |
| Panama   | 2008 | 1.7129181 | 3.7657391 |
| Paraguay | 1990 | 1.7550078 | 3.1685094 |
| Paraguay | 1991 | 1.7536919 | 3.1722641 |
| Paraguay | 1992 | 1.7532441 | 3.1686937 |
| Paraguay | 1993 | 1.7531448 | 3.1790207 |
| Paraguay | 1994 | 1.7541858 | 3.1911904 |
| Paraguay | 1995 | 1.7537381 | 3.209777  |
| Paraguay | 1996 | 1.7513801 | 3.2067339 |
| Paraguay | 1997 | 1.7512611 | 3.215197  |
| Paraguay | 1998 | 1.749163  | 3.2061275 |
| Paraguay | 1999 | 1.7475745 | 3.1909745 |
| Paraguay | 2000 | 1.744855  | 3.1717898 |
| Paraguay | 2001 | 1.743241  | 3.1592846 |
| Paraguay | 2002 | 1.7401535 | 3.1504716 |
| Paraguay | 2003 | 1.7394259 | 3.1602764 |
| Paraguay | 2004 | 1.7382803 | 3.1691491 |
| Paraguay | 2005 | 1.7366208 | 3.1700867 |
| Paraguay | 2006 | 1.7361799 | 3.1824165 |
| Paraguay | 2007 | 1.7354097 | 3.1974397 |

|             |      |           |           |
|-------------|------|-----------|-----------|
| Paraguay    | 2008 | 1.7345649 | 3.2164343 |
| Peru        | 1990 | 1.7748791 | 3.3034333 |
| Peru        | 1991 | 1.7712699 | 3.304024  |
| Peru        | 1992 | 1.7677911 | 3.2937114 |
| Peru        | 1993 | 1.7661284 | 3.3057199 |
| Peru        | 1994 | 1.7628724 | 3.350103  |
| Peru        | 1995 | 1.7601831 | 3.3781355 |
| Peru        | 1996 | 1.7568002 | 3.3812633 |
| Peru        | 1997 | 1.7547009 | 3.4026049 |
| Peru        | 1998 | 1.7517358 | 3.392494  |
| Peru        | 1999 | 1.7492275 | 3.3895293 |
| Peru        | 2000 | 1.7465276 | 3.3956182 |
| Peru        | 2001 | 1.7423133 | 3.3903762 |
| Peru        | 2002 | 1.7403203 | 3.4058004 |
| Peru        | 2003 | 1.7366551 | 3.4174243 |
| Peru        | 2004 | 1.7361196 | 3.4332476 |
| Peru        | 2005 | 1.7354286 | 3.4568942 |
| Peru        | 2006 | 1.7340471 | 3.484484  |
| Peru        | 2007 | 1.7335462 | 3.516798  |
| Peru        | 2008 | 1.7333579 | 3.5527175 |
| Philippines | 1990 | 1.7755446 | 3.0010567 |
| Philippines | 1991 | 1.7742588 | 2.9879572 |
| Philippines | 1992 | 1.7736958 | 2.9791436 |
| Philippines | 1993 | 1.7729298 | 2.9781955 |
| Philippines | 1994 | 1.7728655 | 2.9869444 |
| Philippines | 1995 | 1.773404  | 2.9969859 |
| Philippines | 1996 | 1.7722062 | 3.0119231 |
| Philippines | 1997 | 1.7723337 | 3.0242476 |
| Philippines | 1998 | 1.7696454 | 3.0122204 |
| Philippines | 1999 | 1.7686795 | 3.0160193 |
| Philippines | 2000 | 1.7687505 | 3.0255312 |
| Philippines | 2001 | 1.7671882 | 3.0288121 |
| Philippines | 2002 | 1.7660342 | 3.0353886 |
| Philippines | 2003 | 1.7645158 | 3.0476871 |
| Philippines | 2004 | 1.763678  | 3.0673729 |
| Philippines | 2005 | 1.7628358 | 3.0795207 |
| Philippines | 2006 | 1.7609211 | 3.093963  |
| Philippines | 2007 | 1.7605616 | 3.1143511 |
| Philippines | 2008 | 1.7595111 | 3.1247737 |
| Portugal    | 1990 | 1.7714964 | 4.1388527 |
| Portugal    | 1991 | 1.7752171 | 4.1584219 |
| Portugal    | 1992 | 1.777613  | 4.1634655 |
| Portugal    | 1993 | 1.7697447 | 4.1539685 |
| Portugal    | 1994 | 1.7683281 | 4.15697   |
| Portugal    | 1995 | 1.769086  | 4.1736791 |
| Portugal    | 1996 | 1.7670473 | 4.1877767 |
| Portugal    | 1997 | 1.7697096 | 4.2045669 |

|           |      |           |           |
|-----------|------|-----------|-----------|
| Portugal  | 1998 | 1.7727964 | 4.2241334 |
| Portugal  | 1999 | 1.7745176 | 4.2390156 |
| Portugal  | 2000 | 1.7760988 | 4.2526438 |
| Portugal  | 2001 | 1.7730035 | 4.2580737 |
| Portugal  | 2002 | 1.7753843 | 4.2590024 |
| Portugal  | 2003 | 1.7987282 | 4.253397  |
| Portugal  | 2004 | 1.7939984 | 4.2590826 |
| Portugal  | 2005 | 1.8024142 | 4.2616299 |
| Portugal  | 2006 | 1.7933917 | 4.2670915 |
| Portugal  | 2007 | 1.793401  | 4.276392  |
| Portugal  | 2008 | 1.7904405 | 4.2757288 |
| Senegal   | 1990 | 1.8276604 | 2.8332209 |
| Senegal   | 1991 | 1.8261415 | 2.8307792 |
| Senegal   | 1992 | 1.8254153 | 2.8228229 |
| Senegal   | 1993 | 1.8252824 | 2.8153933 |
| Senegal   | 1994 | 1.8255224 | 2.8027808 |
| Senegal   | 1995 | 1.8259333 | 2.8135555 |
| Senegal   | 1996 | 1.8271751 | 2.8109497 |
| Senegal   | 1997 | 1.8266038 | 2.8135741 |
| Senegal   | 1998 | 1.8261856 | 2.827989  |
| Senegal   | 1999 | 1.8249001 | 2.8441676 |
| Senegal   | 2000 | 1.8234539 | 2.8470024 |
| Senegal   | 2001 | 1.8205345 | 2.855263  |
| Senegal   | 2002 | 1.8185257 | 2.8466225 |
| Senegal   | 2003 | 1.8130725 | 2.8630281 |
| Senegal   | 2004 | 1.8087596 | 2.8760021 |
| Senegal   | 2005 | 1.804553  | 2.8879136 |
| Senegal   | 2006 | 1.799144  | 2.8866121 |
| Senegal   | 2007 | 1.795241  | 2.8956366 |
| Senegal   | 2008 | 1.7919471 | 2.8993321 |
| Singapore | 1990 | 1.8975848 | 4.2135738 |
| Singapore | 1991 | 1.9000831 | 4.2284862 |
| Singapore | 1992 | 1.904206  | 4.2449507 |
| Singapore | 1993 | 1.9086849 | 4.2811556 |
| Singapore | 1994 | 1.9212582 | 4.3112007 |
| Singapore | 1995 | 1.9124905 | 4.3285144 |
| Singapore | 1996 | 1.9208026 | 4.3427825 |
| Singapore | 1997 | 1.9347524 | 4.3636649 |
| Singapore | 1998 | 1.8876562 | 4.3393787 |
| Singapore | 1999 | 1.9230779 | 4.3620205 |
| Singapore | 2000 | 1.9465973 | 4.3920918 |
| Singapore | 2001 | 1.9042909 | 4.3753374 |
| Singapore | 2002 | 1.9036408 | 4.3892433 |
| Singapore | 2003 | 1.9196847 | 4.4151047 |
| Singapore | 2004 | 1.9284179 | 4.4477211 |
| Singapore | 2005 | 1.9591527 | 4.4683974 |
| Singapore | 2006 | 1.9701505 | 4.4907285 |

|              |      |           |           |
|--------------|------|-----------|-----------|
| Singapore    | 2007 | 1.9714973 | 4.5101435 |
| Singapore    | 2008 | 1.9669278 | 4.4945566 |
| South Africa | 1990 | 1.8548487 | 3.6862361 |
| South Africa | 1991 | 1.8576287 | 3.6728388 |
| South Africa | 1992 | 1.8523968 | 3.6543955 |
| South Africa | 1993 | 1.8536761 | 3.650549  |
| South Africa | 1994 | 1.8585699 | 3.6550914 |
| South Africa | 1995 | 1.8600974 | 3.6590258 |
| South Africa | 1996 | 1.8629845 | 3.6676742 |
| South Africa | 1997 | 1.8707513 | 3.6690821 |
| South Africa | 1998 | 1.8769524 | 3.6611125 |
| South Africa | 1999 | 1.8909943 | 3.6607506 |
| South Africa | 2000 | 1.8979511 | 3.6676713 |
| South Africa | 2001 | 1.9024808 | 3.6705037 |
| South Africa | 2002 | 1.9076342 | 3.67754   |
| South Africa | 2003 | 1.9195909 | 3.6845062 |
| South Africa | 2004 | 1.931339  | 3.6981761 |
| South Africa | 2005 | 1.9332713 | 3.7148199 |
| South Africa | 2006 | 1.9326228 | 3.7327917 |
| South Africa | 2007 | 1.9282607 | 3.750516  |
| South Africa | 2008 | 1.9215288 | 3.7602259 |
| Spain        | 1990 | 1.769727  | 4.2743179 |
| Spain        | 1991 | 1.7706275 | 4.2842471 |
| Spain        | 1992 | 1.7683832 | 4.286831  |
| Spain        | 1993 | 1.75938   | 4.2809778 |
| Spain        | 1994 | 1.7598711 | 4.2900381 |
| Spain        | 1995 | 1.7634346 | 4.3008355 |
| Spain        | 1996 | 1.759797  | 4.3103467 |
| Spain        | 1997 | 1.7579536 | 4.3257302 |
| Spain        | 1998 | 1.7615991 | 4.3431942 |
| Spain        | 1999 | 1.7641156 | 4.3610418 |
| Spain        | 2000 | 1.76689   | 4.3787781 |
| Spain        | 2001 | 1.7647602 | 4.3891457 |
| Spain        | 2002 | 1.7678841 | 4.3936195 |
| Spain        | 2003 | 1.7683883 | 4.3989797 |
| Spain        | 2004 | 1.7728886 | 4.4054153 |
| Spain        | 2005 | 1.7737738 | 4.4133697 |
| Spain        | 2006 | 1.7725752 | 4.4233801 |
| Spain        | 2007 | 1.7727933 | 4.430194  |
| Spain        | 2008 | 1.7680624 | 4.427121  |
| Sri Lanka    | 1990 | 1.7418561 | 2.8513366 |
| Sri Lanka    | 1991 | 1.7416151 | 2.8644834 |
| Sri Lanka    | 1992 | 1.7421241 | 2.879203  |
| Sri Lanka    | 1993 | 1.7427711 | 2.9027322 |
| Sri Lanka    | 1994 | 1.743799  | 2.9204078 |
| Sri Lanka    | 1995 | 1.7440159 | 2.9377533 |
| Sri Lanka    | 1996 | 1.7446621 | 2.9491876 |

|             |      |           |           |
|-------------|------|-----------|-----------|
| Sri Lanka   | 1997 | 1.7438742 | 2.9706908 |
| Sri Lanka   | 1998 | 1.7421063 | 2.9856079 |
| Sri Lanka   | 1999 | 1.7400371 | 2.9976509 |
| Sri Lanka   | 2000 | 1.7364769 | 3.0219097 |
| Sri Lanka   | 2001 | 1.7323493 | 3.0221361 |
| Sri Lanka   | 2002 | 1.7295217 | 3.0361663 |
| Sri Lanka   | 2003 | 1.7261065 | 3.0554814 |
| Sri Lanka   | 2004 | 1.7248546 | 3.0726131 |
| Sri Lanka   | 2005 | 1.7243644 | 3.094263  |
| Sri Lanka   | 2006 | 1.723829  | 3.1216452 |
| Sri Lanka   | 2007 | 1.7242826 | 3.146263  |
| Sri Lanka   | 2008 | 1.7247903 | 3.1675237 |
| Sweden      | 1990 | 1.798229  | 4.4889416 |
| Sweden      | 1991 | 1.8004088 | 4.4809756 |
| Sweden      | 1992 | 1.7992051 | 4.4733673 |
| Sweden      | 1993 | 1.7845047 | 4.4617799 |
| Sweden      | 1994 | 1.7861937 | 4.4757794 |
| Sweden      | 1995 | 1.7747019 | 4.4902772 |
| Sweden      | 1996 | 1.7834473 | 4.496532  |
| Sweden      | 1997 | 1.7737713 | 4.5078894 |
| Sweden      | 1998 | 1.7745888 | 4.5255366 |
| Sweden      | 1999 | 1.7636069 | 4.5449783 |
| Sweden      | 2000 | 1.7667959 | 4.5631985 |
| Sweden      | 2001 | 1.760387  | 4.5674803 |
| Sweden      | 2002 | 1.7674774 | 4.5767206 |
| Sweden      | 2003 | 1.7663906 | 4.5851318 |
| Sweden      | 2004 | 1.7669116 | 4.6014367 |
| Sweden      | 2005 | 1.7643887 | 4.6132144 |
| Sweden      | 2006 | 1.7654254 | 4.6290441 |
| Sweden      | 2007 | 1.7627892 | 4.6399838 |
| Sweden      | 2008 | 1.7602461 | 4.6339283 |
| Switzerland | 1990 | 1.8355127 | 4.6827993 |
| Switzerland | 1991 | 1.8338591 | 4.6733757 |
| Switzerland | 1992 | 1.8312415 | 4.6683975 |
| Switzerland | 1993 | 1.8221952 | 4.6638948 |
| Switzerland | 1994 | 1.8165827 | 4.6659126 |
| Switzerland | 1995 | 1.8169722 | 4.6650938 |
| Switzerland | 1996 | 1.8306807 | 4.6652756 |
| Switzerland | 1997 | 1.82022   | 4.6730094 |
| Switzerland | 1998 | 1.8450948 | 4.6834339 |
| Switzerland | 1999 | 1.8156242 | 4.6873839 |
| Switzerland | 2000 | 1.8293609 | 4.7006015 |
| Switzerland | 2001 | 1.8165294 | 4.703219  |
| Switzerland | 2002 | 1.8002168 | 4.700738  |
| Switzerland | 2003 | 1.8092322 | 4.6976075 |
| Switzerland | 2004 | 1.8094798 | 4.7050116 |
| Switzerland | 2005 | 1.8073483 | 4.7137786 |

|             |      |           |           |
|-------------|------|-----------|-----------|
| Switzerland | 2006 | 1.8058205 | 4.7270478 |
| Switzerland | 2007 | 1.8017151 | 4.7395551 |
| Switzerland | 2008 | 1.8032108 | 4.7433359 |
| Tanzania    | 1990 | 1.8782135 | 2.4783206 |
| Tanzania    | 1991 | 1.881002  | 2.4729642 |
| Tanzania    | 1992 | 1.8837106 | 2.4609511 |
| Tanzania    | 1993 | 1.8862718 | 2.4517429 |
| Tanzania    | 1994 | 1.8881677 | 2.4447091 |
| Tanzania    | 1995 | 1.8899375 | 2.4470625 |
| Tanzania    | 1996 | 1.8901137 | 2.4544312 |
| Tanzania    | 1997 | 1.8894891 | 2.4582864 |
| Tanzania    | 1998 | 1.8881258 | 2.4633705 |
| Tanzania    | 1999 | 1.8859293 | 2.4732658 |
| Tanzania    | 2000 | 1.8826429 | 2.4833866 |
| Tanzania    | 2001 | 1.8782444 | 2.4976854 |
| Tanzania    | 2002 | 1.8727045 | 2.5165681 |
| Tanzania    | 2003 | 1.86633   | 2.5340891 |
| Tanzania    | 2004 | 1.8590219 | 2.5551387 |
| Tanzania    | 2005 | 1.8514051 | 2.5740304 |
| Tanzania    | 2006 | 1.8430715 | 2.5900408 |
| Tanzania    | 2007 | 1.8344293 | 2.6074318 |
| Tanzania    | 2008 | 1.8259587 | 2.6257653 |
| Thailand    | 1990 | 1.7565628 | 3.1963347 |
| Thailand    | 1991 | 1.7585586 | 3.2274044 |
| Thailand    | 1992 | 1.7595429 | 3.2575582 |
| Thailand    | 1993 | 1.7625478 | 3.2889235 |
| Thailand    | 1994 | 1.7649489 | 3.3231578 |
| Thailand    | 1995 | 1.768135  | 3.3578857 |
| Thailand    | 1996 | 1.7697063 | 3.3785508 |
| Thailand    | 1997 | 1.7664513 | 3.3678775 |
| Thailand    | 1998 | 1.7572614 | 3.3146597 |
| Thailand    | 1999 | 1.7602523 | 3.3284535 |
| Thailand    | 2000 | 1.7600859 | 3.3435613 |
| Thailand    | 2001 | 1.7599696 | 3.347847  |
| Thailand    | 2002 | 1.7586916 | 3.3653583 |
| Thailand    | 2003 | 1.76009   | 3.3906346 |
| Thailand    | 2004 | 1.762157  | 3.4133321 |
| Thailand    | 2005 | 1.7618224 | 3.4297447 |
| Thailand    | 2006 | 1.7584415 | 3.4491739 |
| Thailand    | 2007 | 1.7573945 | 3.4692764 |
| Thailand    | 2008 | 1.7551087 | 3.4792217 |
| Tunisia     | 1990 | 1.7530764 | 3.3015166 |
| Tunisia     | 1991 | 1.7535961 | 3.3095138 |
| Tunisia     | 1992 | 1.7511166 | 3.3332824 |
| Tunisia     | 1993 | 1.7521056 | 3.3342052 |
| Tunisia     | 1994 | 1.7486095 | 3.3399395 |
| Tunisia     | 1995 | 1.7472014 | 3.3430896 |

|         |      |           |           |
|---------|------|-----------|-----------|
| Tunisia | 1996 | 1.7465464 | 3.3667223 |
| Tunisia | 1997 | 1.7435838 | 3.3837667 |
| Tunisia | 1998 | 1.7426493 | 3.3985208 |
| Tunisia | 1999 | 1.7404936 | 3.4183828 |
| Tunisia | 2000 | 1.7415266 | 3.4334564 |
| Tunisia | 2001 | 1.7396841 | 3.4492969 |
| Tunisia | 2002 | 1.7392324 | 3.452227  |
| Tunisia | 2003 | 1.739134  | 3.4731314 |
| Tunisia | 2004 | 1.7383576 | 3.4948037 |
| Tunisia | 2005 | 1.7364198 | 3.5077157 |
| Tunisia | 2006 | 1.734637  | 3.5260882 |
| Tunisia | 2007 | 1.7322294 | 3.5486555 |
| Tunisia | 2008 | 1.7321678 | 3.5638682 |
| Turkey  | 1990 | 1.8140872 | 3.7000886 |
| Turkey  | 1991 | 1.8113252 | 3.6958947 |
| Turkey  | 1992 | 1.8072356 | 3.7101402 |
| Turkey  | 1993 | 1.8067183 | 3.7352285 |
| Turkey  | 1994 | 1.7928489 | 3.7076259 |
| Turkey  | 1995 | 1.794331  | 3.7337621 |
| Turkey  | 1996 | 1.7874006 | 3.7579086 |
| Turkey  | 1997 | 1.7851325 | 3.7828893 |
| Turkey  | 1998 | 1.781537  | 3.7861197 |
| Turkey  | 1999 | 1.7763387 | 3.7646753 |
| Turkey  | 2000 | 1.778184  | 3.7866969 |
| Turkey  | 2001 | 1.7650983 | 3.7549018 |
| Turkey  | 2002 | 1.7654075 | 3.7746762 |
| Turkey  | 2003 | 1.764678  | 3.7908861 |
| Turkey  | 2004 | 1.7646815 | 3.8238202 |
| Turkey  | 2005 | 1.7659403 | 3.8530642 |
| Turkey  | 2006 | 1.7657659 | 3.8763894 |
| Turkey  | 2007 | 1.7658978 | 3.8907336 |
| Turkey  | 2008 | 1.7634703 | 3.888201  |
| Uganda  | 1990 | 1.9037982 | 2.2958739 |
| Uganda  | 1991 | 1.9078915 | 2.3042283 |
| Uganda  | 1992 | 1.9117267 | 2.3039577 |
| Uganda  | 1993 | 1.9149769 | 2.3240992 |
| Uganda  | 1994 | 1.9173263 | 2.3367501 |
| Uganda  | 1995 | 1.9184346 | 2.3700802 |
| Uganda  | 1996 | 1.9174133 | 2.394048  |
| Uganda  | 1997 | 1.914957  | 2.4021325 |
| Uganda  | 1998 | 1.9111551 | 2.4094556 |
| Uganda  | 1999 | 1.9056564 | 2.4294465 |
| Uganda  | 2000 | 1.8986239 | 2.428923  |
| Uganda  | 2001 | 1.8910093 | 2.4365753 |
| Uganda  | 2002 | 1.8827259 | 2.4583745 |
| Uganda  | 2003 | 1.8744929 | 2.4708855 |
| Uganda  | 2004 | 1.8662164 | 2.4847145 |

|                          |      |           |           |
|--------------------------|------|-----------|-----------|
| Uganda                   | 2005 | 1.8583699 | 2.4966515 |
| Uganda                   | 2006 | 1.8509739 | 2.5264665 |
| Uganda                   | 2007 | 1.8435234 | 2.5469238 |
| Uganda                   | 2008 | 1.8364251 | 2.5685956 |
| United Kingdom           | 1990 | 1.8058698 | 4.4138754 |
| United Kingdom           | 1991 | 1.8077035 | 4.4068828 |
| United Kingdom           | 1992 | 1.8040761 | 4.4112951 |
| United Kingdom           | 1993 | 1.8060463 | 4.4251544 |
| United Kingdom           | 1994 | 1.8015763 | 4.4450453 |
| United Kingdom           | 1995 | 1.7999733 | 4.4589768 |
| United Kingdom           | 1996 | 1.8026092 | 4.4727749 |
| United Kingdom           | 1997 | 1.7995585 | 4.4901506 |
| United Kingdom           | 1998 | 1.8045739 | 4.5041065 |
| United Kingdom           | 1999 | 1.7977027 | 4.5152358 |
| United Kingdom           | 2000 | 1.7962904 | 4.5322276 |
| United Kingdom           | 2001 | 1.7962382 | 4.5400284 |
| United Kingdom           | 2002 | 1.7949004 | 4.5480207 |
| United Kingdom           | 2003 | 1.7962514 | 4.5628285 |
| United Kingdom           | 2004 | 1.7985286 | 4.5739218 |
| United Kingdom           | 2005 | 1.7948737 | 4.5847918 |
| United Kingdom           | 2006 | 1.7960689 | 4.593439  |
| United Kingdom           | 2007 | 1.7953083 | 4.6047418 |
| United Kingdom           | 2008 | 1.7928264 | 4.5980208 |
| United States of America | 1990 | 1.8854922 | 4.5180582 |
| United States of America | 1991 | 1.8825949 | 4.5119392 |
| United States of America | 1992 | 1.8794476 | 4.5210881 |
| United States of America | 1993 | 1.8878996 | 4.527122  |
| United States of America | 1994 | 1.8885399 | 4.5389819 |
| United States of America | 1995 | 1.8851261 | 4.5454595 |
| United States of America | 1996 | 1.8839396 | 4.5565869 |
| United States of America | 1997 | 1.884363  | 4.5704222 |
| United States of America | 1998 | 1.885224  | 4.5842673 |
| United States of America | 1999 | 1.8871809 | 4.5998342 |
| United States of America | 2000 | 1.8929952 | 4.6124132 |
| United States of America | 2001 | 1.8878639 | 4.6122154 |
| United States of America | 2002 | 1.8891188 | 4.6158322 |
| United States of America | 2003 | 1.8843251 | 4.6240543 |
| United States of America | 2004 | 1.8867551 | 4.6362241 |
| United States of America | 2005 | 1.8856531 | 4.6465369 |
| United States of America | 2006 | 1.8806988 | 4.6537782 |
| United States of America | 2007 | 1.8797806 | 4.6573526 |
| United States of America | 2008 | 1.8734257 | 4.6519818 |
| Uruguay                  | 1990 | 1.7352527 | 3.5976509 |
| Uruguay                  | 1991 | 1.7359492 | 3.6096933 |
| Uruguay                  | 1992 | 1.7370085 | 3.6397026 |
| Uruguay                  | 1993 | 1.7371336 | 3.6479099 |
| Uruguay                  | 1994 | 1.7355076 | 3.6752523 |

|           |      |           |           |
|-----------|------|-----------|-----------|
| Uruguay   | 1995 | 1.7337284 | 3.6657904 |
| Uruguay   | 1996 | 1.7366033 | 3.6862498 |
| Uruguay   | 1997 | 1.7379053 | 3.7188102 |
| Uruguay   | 1998 | 1.7374458 | 3.7352085 |
| Uruguay   | 1999 | 1.7401942 | 3.7244395 |
| Uruguay   | 2000 | 1.7342431 | 3.7144095 |
| Uruguay   | 2001 | 1.7308965 | 3.6966116 |
| Uruguay   | 2002 | 1.7248531 | 3.6615663 |
| Uruguay   | 2003 | 1.7240242 | 3.6653224 |
| Uruguay   | 2004 | 1.7265277 | 3.6867365 |
| Uruguay   | 2005 | 1.7272116 | 3.7178097 |
| Uruguay   | 2006 | 1.7298417 | 3.7345938 |
| Uruguay   | 2007 | 1.7296702 | 3.7610489 |
| Uruguay   | 2008 | 1.7294636 | 3.7897814 |
| Venezuela | 1990 | 1.7803923 | 3.7229845 |
| Venezuela | 1991 | 1.7802333 | 3.7529182 |
| Venezuela | 1992 | 1.7766761 | 3.7684325 |
| Venezuela | 1993 | 1.7804089 | 3.7599007 |
| Venezuela | 1994 | 1.7784478 | 3.7401078 |
| Venezuela | 1995 | 1.7801979 | 3.7476898 |
| Venezuela | 1996 | 1.7701694 | 3.7377894 |
| Venezuela | 1997 | 1.7757924 | 3.7557817 |
| Venezuela | 1998 | 1.7875409 | 3.7484177 |
| Venezuela | 1999 | 1.7738395 | 3.7132152 |
| Venezuela | 2000 | 1.7608793 | 3.7206299 |
| Venezuela | 2001 | 1.7734358 | 3.726967  |
| Venezuela | 2002 | 1.7611536 | 3.6786829 |
| Venezuela | 2003 | 1.7672492 | 3.6357488 |
| Venezuela | 2004 | 1.7563919 | 3.7009406 |
| Venezuela | 2005 | 1.7580362 | 3.735971  |
| Venezuela | 2006 | 1.7641216 | 3.7693676 |
| Venezuela | 2007 | 1.769079  | 3.7984461 |
| Venezuela | 2008 | 1.7686329 | 3.8135513 |
| Vietnam   | 1990 | 1.735134  | 2.479017  |
| Vietnam   | 1991 | 1.7329785 | 2.496173  |
| Vietnam   | 1992 | 1.7309951 | 2.5244561 |
| Vietnam   | 1993 | 1.7295384 | 2.5506595 |
| Vietnam   | 1994 | 1.7280378 | 2.5801472 |
| Vietnam   | 1995 | 1.72687   | 2.6126    |
| Vietnam   | 1996 | 1.7257859 | 2.6444304 |
| Vietnam   | 1997 | 1.7249768 | 2.6716903 |
| Vietnam   | 1998 | 1.7234028 | 2.6893637 |
| Vietnam   | 1999 | 1.7210328 | 2.7031009 |
| Vietnam   | 2000 | 1.720194  | 2.725796  |
| Vietnam   | 2001 | 1.7192982 | 2.7463875 |
| Vietnam   | 2002 | 1.7193602 | 2.7679659 |
| Vietnam   | 2003 | 1.720642  | 2.791893  |

|          |      |           |           |
|----------|------|-----------|-----------|
| Vietnam  | 2004 | 1.7219198 | 2.8182484 |
| Vietnam  | 2005 | 1.7213951 | 2.8447802 |
| Vietnam  | 2006 | 1.7213451 | 2.8692547 |
| Vietnam  | 2007 | 1.7211372 | 2.8944556 |
| Vietnam  | 2008 | 1.7206651 | 2.9137511 |
| Zambia   | 1990 | 1.9436533 | 2.830481  |
| Zambia   | 1991 | 1.9512386 | 2.8197295 |
| Zambia   | 1992 | 1.9581309 | 2.8019347 |
| Zambia   | 1993 | 1.9642861 | 2.8203975 |
| Zambia   | 1994 | 1.9677591 | 2.7709094 |
| Zambia   | 1995 | 1.9713299 | 2.7477456 |
| Zambia   | 1996 | 1.9729315 | 2.765661  |
| Zambia   | 1997 | 1.9740651 | 2.7681021 |
| Zambia   | 1998 | 1.9720958 | 2.7481226 |
| Zambia   | 1999 | 1.9679535 | 2.7459696 |
| Zambia   | 2000 | 1.9632252 | 2.7495764 |
| Zambia   | 2001 | 1.9555898 | 2.7592432 |
| Zambia   | 2002 | 1.9461531 | 2.76252   |
| Zambia   | 2003 | 1.9350322 | 2.7733745 |
| Zambia   | 2004 | 1.9233811 | 2.7852042 |
| Zambia   | 2005 | 1.9107634 | 2.7964729 |
| Zambia   | 2006 | 1.8980064 | 2.811147  |
| Zambia   | 2007 | 1.8845522 | 2.8251936 |
| Zambia   | 2008 | 1.871981  | 2.8384303 |
| Zimbabwe | 1990 | 1.8250779 | 2.8315834 |
| Zimbabwe | 1991 | 1.8333098 | 2.8438493 |
| Zimbabwe | 1992 | 1.8439558 | 2.792887  |
| Zimbabwe | 1993 | 1.8549061 | 2.7884454 |
| Zimbabwe | 1994 | 1.8703908 | 2.8184495 |
| Zimbabwe | 1995 | 1.8832677 | 2.8112011 |
| Zimbabwe | 1996 | 1.8982584 | 2.8463691 |
| Zimbabwe | 1997 | 1.913086  | 2.8505971 |
| Zimbabwe | 1998 | 1.9256964 | 2.8563775 |
| Zimbabwe | 1999 | 1.9398646 | 2.8473334 |
| Zimbabwe | 2000 | 1.9492919 | 2.8296896 |
| Zimbabwe | 2001 | 1.9569775 | 2.83302   |
| Zimbabwe | 2002 | 1.9618813 | 2.7907022 |
| Zimbabwe | 2003 | 1.9599328 | 2.7087018 |
| Zimbabwe | 2004 | 1.9537464 | 2.682035  |
| Zimbabwe | 2005 | 1.9469848 | 2.6558959 |
| Zimbabwe | 2006 | 1.9349246 | 2.640128  |
| Zimbabwe | 2007 | 1.9207257 | 2.623424  |
| Zimbabwe | 2008 | 1.9013944 | 2.5374944 |
